# Supplementary material for: Structure resembling effect of clay surface on photochemical properties of meso-phenyl or pyridyl-substituted monocationic antimony(v) porphyrin derivatives
Source: Royal Society of Chemistry journal article supplement (doi:10.1039/c4ra15650a), 2014-12-24
Supplement: c4ra15650a1.pdf [file c4ra15650a1.pdf]

# Structure resembling effect of clay surface on photochemical properties of *meso*-phenyl or pyridyl- substituted monocationic antimony(V) porphyrin derivatives

*Takamasa Tsukamoto<sup>a, b</sup>, Tetsuya Shimada<sup>a</sup> and Shinsuke Takagi<sup>a \*</sup>*

<sup>a</sup>Department of Applied Chemistry, Graduate Course of Urban Environmental Sciences, Tokyo  
Metropolitan University, Minami-ohsawa 1-1, Hachiohji, Tokyo 192-0397 Japan

<sup>b</sup>Japan Society for the Promotion of Science (JSPS / DC2), Ichibancho, Chiyoda-ku, Tokyo 102-  
8471 Japan

Tel.: +81 42 677 2839; fax: +81 42 677 2838

Corresponding author E-mail address: takagi-shinsuke@tmu.ac.jp (Shinsuke Takagi)

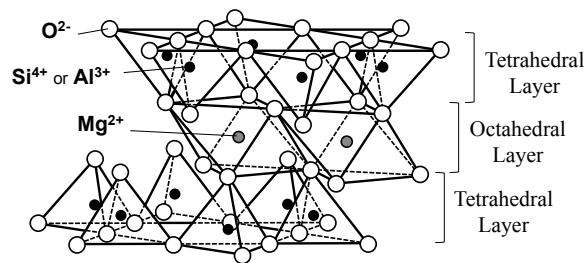

**Figure S1.** The structure of synthetic saponite,  $[(\text{Si}_{7.2}\text{Al}_{0.8})(\text{Mg}_{5.97}\text{Al}_{0.03})\text{O}_{20}(\text{OH})_4]^{-0.77}$ .

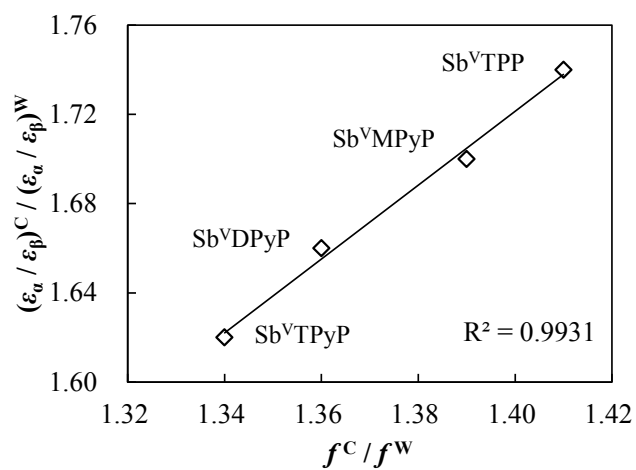

**Figure S2.** The plot of  $(\epsilon_a / \epsilon_b)^c / (\epsilon_a / \epsilon_b)^w$  values against  $f^c / f^w$  values for Sb<sup>v</sup>Pors.

### Synthesis of $\text{Sb}^{\text{V}}\text{Por}$

$\text{SbCl}_5$ , 5,10,15,20-tetraphenylporphine (TPP) and 5,10,15,20-tetrakis(4-pyridyl)porphine (TPyP) were purchased from Aldrich, and used without further purification. 5,10,15-triphenyl-20-mono(4-pyridyl)porphine (MPyP) and 5,15-diphenyl-10,20-di(4-pyridyl)porphine (DPyP) was purchased from Frontier Scientific, and used without further purification. All syntheses were carried out under nitrogen atmosphere.  $^1\text{H}$ -NMR spectra in  $\text{D}_2\text{O}$  were recorded on a Bruker B-500.

### Synthesis of $[\text{Sb}^{\text{V}}(\text{TPP})(\text{OH})_2]\text{Cl}$

Dihydroxo(5,10,15,20-tetraphenylporphyrinato)antimony(V) chloride (  $[\text{Sb}^{\text{V}}(\text{TPP})(\text{OH})_2]\text{Cl}$  ) was synthesized according to established routes<sup>29</sup>.

### Synthesis of $[\text{Sb}^{\text{V}}(\text{MPyP})(\text{OH})_2]\text{Cl}$

Dihydroxo[5,10,15-triphenyl-20-mono(4-pyridyl)porphyrinato]antimony(V) chloride (  $[\text{Sb}^{\text{V}}(\text{MPyP})(\text{OH})_2]\text{Cl}$  ) was synthesized as below.  $\text{SbCl}_5$  (1 mL) was added to a solution of MPyP (40.0 mg) in pyridine (30 mL). The reaction mixture was refluxed for 50 hours.  $\text{H}_2\text{O}$  (2 mL) was added to the solution. The solvent was evaporated and the residue was solved in  $\text{CHCl}_3$  (100 mL). The  $\text{CHCl}_3$  solution was washed three times with 200 mL portions of  $\text{H}_2\text{O}$  and red violet  $\text{CHCl}_3$  solution was extracted. After the KCl aqueous solution (1 M, 100 mL) was added to the  $\text{CHCl}_3$  solution, the solution was stirred for 21 hours and the  $\text{CHCl}_3$  phase was extracted two times and . The  $\text{CHCl}_3$  solution was washed two times with 200 mL portions of  $\text{H}_2\text{O}$  and red

violet  $\text{CHCl}_3$  solution was extracted. The counter ion (antimony complex anion) was exchanged to  $\text{Cl}^-$  by the use of ion-exchange resin (Organo, Amberlite Resin IRA-400) to give dihydroxo[5,15-diphenyl-10,20-di(4-pyridyl)porphyrinato]antimony(V) chloride ( $[\text{Sb}^{\text{V}}(\text{DPyP})(\text{OH})_2]\text{Cl}$ ) in ca. 11% yield.  $^1\text{H-NMR}$  ( $\text{D}_2\text{O}$  /ppm)  $\delta$  7.99 (6H, t, *m*-Ph), 8.04 (3H, t, *p*-Ph), 8.44 (6H, d, *o*-Ph), 8.50 (2H, d, *m*-Py), 9.13 (2H, d, *o*-Py), 9.68 (2H, d,  $\beta$ -Pyrr), 9.74 (4H, s,  $\beta$ -Pyrr), 9.76 (2H, s,  $\beta$ -Pyrr).

### Synthesis of $[\text{Sb}^{\text{V}}(\text{DPyP})(\text{OH})_2]\text{Cl}$

Dihydroxo[5,15-diphenyl-10,20-di(4-pyridyl)porphyrinato]antimony(V) chloride ( $[\text{Sb}^{\text{V}}(\text{DPyP})(\text{OH})_2]\text{Cl}$ ) was synthesized as below.  $\text{SbCl}_5$  (1 mL) was added to a solution of DPyP (30.0 mg) in pyridine (30 mL). The reaction mixture was refluxed for 18 hours.  $\text{H}_2\text{O}$  (2 mL) was added to the solution. The solvent was evaporated and the residue was solved in  $\text{CHCl}_3$  (100 mL). The  $\text{CHCl}_3$  solution was washed two times with 200 mL portions of  $\text{H}_2\text{O}$  and red violet  $\text{CHCl}_3$  solution was extracted. After the KCl aqueous solution (1 M, 100 mL) was added to the  $\text{CHCl}_3$  solution, the solution was stirred for 24 hours and the  $\text{CHCl}_3$  phase was extracted tow times and . The  $\text{CHCl}_3$  solution was washed two times with 100 mL portions of  $\text{H}_2\text{O}$  and red violet  $\text{CHCl}_3$  solution was extracted and the solvent. The counter ion (antimony complex anion) was exchanged to  $\text{Cl}^-$  by the use of ion-exchange resin (Organo, Amberlite Resin IRA-400) to give dihydroxo[5,15-diphenyl-10,20-di(4-pyridyl)porphyrinato]antimony(V) chloride ( $[\text{Sb}^{\text{V}}(\text{DPyP})(\text{OH})_2]\text{Cl}$ ) in ca. 13% yield.  $^1\text{H-NMR}$  ( $\text{D}_2\text{O}$  /ppm)  $\delta$  8.00 (4H, t, *m*-Ph), 8.06 (2H, t, *p*-Ph), 8.46 (4H, d, *o*-Ph), 8.52 (4H, d, *m*-Py), 9.14 (4H, d, *o*-Py) , 9.71 (4H, d,  $\beta$ -Pyrr), 9.79 (4H, d,  $\beta$ -Pyrr).

### Synthesis of $[\text{Sb}^{\text{V}}(\text{TPyP})(\text{OH})_2]\text{Cl}$

Dihydroxo[5,10,15,20-tetrakis(4-pyridyl)porphyrinato]antimony(V) chloride (  $[\text{Sb}^{\text{V}}(\text{TPyP})(\text{OH})_2]\text{Cl}$  ) was synthesized according to established routes<sup>29</sup>.
